# Supplementary material for: The Effect of Inclines on Joint Angles in Stroke Survivors During Treadmill Walking
Source: Front Neurol. 2022 Apr 11;13:850682. doi: 10.3389/fneur.2022.850682 (PMC9037685; doi:10.3389/fneur.2022.850682)
Supplement: Supplementary file 1 [file Table_1.XLSX]

## Sheet: HipExtension
	HipExtension_P							HipExtension_N
	Level	#3	#6					Level	#3	#6
StSub01	-9.49535	-7.38395	-6.93758				StSub01	-7.44425	-6.28528	-5.79203
StSub02	-6.47792	-5.08946	1.57649				StSub02	-4.94147	-2.70161	-2.93245
StSub03	7.5968	5.82826	5.44423				StSub03	2.55447	2.48436	1.9135
StSub04	-13.25	-12.0269	-10.8893				StSub04	-15.2414	-13.4077	-11.5913
StSub05	2.77464	4.4383	6.74528				StSub05	-4.91089	-2.66617	-0.608073
StSub06	-7.15732	-5.15798	-4.34033				StSub06	-7.21537	-7.24468	-5.45361
StSub07	1.23826	3.57075	5.1039				StSub07	-3.24758	-0.437176	-0.824197
StSub08	13.9941	14.1911	15.7062				StSub08	17.289	12.526	12.6979
StSub09	-0.110059	3.6833	2.17562				StSub09	2.23801	1.80401	1.21622
StSub10	7.01979	3.65462	4.0751				StSub10	8.26602	5.9226	5.9907
StSub11	5.85911	7.83573	11.1657				StSub11	11.2639	11.8566	7.558
StSub12	-3.80651	-4.23313	-6.91492				StSub12	-8.61385	-2.55473	-2.26256
StSub13	-4.6451	-3.81003	-1.64933				StSub13	-19.9008	-18.5054	-16.3594
StSub14	-0.889481	-1.35541	0.527102				StSub14	-0.873508	-0.0853993	1.02861
StSub15	-5.03607	-0.386844	-2.05107				StSub15	-7.69048	-7.65302	-5.05424
ClSub01	-7.51841	-11.6573	-13.3911				ClSub01	-7.87776	-11.8938	-13.6828
ClSub02	-5.86739	-5.03631	-10.6138				ClSub02	-5.90395	-4.24674	-10.8007
ClSub03	-1.86891	-2.10045	-7.79441				ClSub03	-2.84726	-3.14525	-9.82044
ClSub04	-4.70873	-4.89404	-5.64729				ClSub04	-4.83164	-3.52187	-5.78979
ClSub05	-5.09865	0.522705	-3.66611				ClSub05	-7.14179	-1.86161	-3.59783
ClSub06	-0.445447	-0.267773	0.784508				ClSub06	-0.0742448	0.0958465	1.61508
ClSub07	-4.77506	-5.29013	-5.63067				ClSub07	-4.39354	-5.33551	-5.53657
ClSub08	-8.68945	-9.55774	-10.6637				ClSub08	-7.96003	-7.60696	-9.28776
ClSub09	-3.33269	-4.36082	-4.76358				ClSub09	-2.71452	-4.0118	-4.25436
ClSub10	-2.18689	-2.10045	-7.79441				ClSub10	-2.84726	-3.14525	-9.82044
ClSub11	-1.73434	-1.70226	-1.81193				ClSub11	-1.69724	-1.6166	-1.61675
ClSub12	-6.94118	-3.96174	-7.18509				ClSub12	-7.21504	-3.43257	-7.82335
ClSub13	-11.6573	-7.51841	-13.3911				ClSub13	-11.8938	-11.8778	-13.6828
ClSub14	-4.34872	-2.15612	-3.79758				ClSub14	-5.19042	-3.84386	-4.60305
ClSub15	-7.334	-6.02435	-10.6296				ClSub15	-4.47886	-5.99968	-10.4462
	HipExtension_PV							HipExtension_NV
	Level	#3	#6					Level	#3	#6
StSub01	2.054	1.55582	1.71939				StSub01	1.40732	1.87721	1.60252
StSub02	2.56188	1.69497	2.09845				StSub02	2.34438	2.23345	3.04103
StSub03	1.92674	1.87132	2.89648				StSub03	2.78991	2.13746	3.26777
StSub04	1.45842	1.10468	0.998323				StSub04	1.38859	0.964036	1.01129
StSub05	1.76424	2.00677	1.83418				StSub05	2.14419	2.37724	2.11478
StSub06	2.32418	1.80502	2.14794				StSub06	2.8095	2.16283	3.09531
StSub07	1.06182	1.02257	1.08694				StSub07	1.81987	1.68831	1.48479
StSub08	1.57982	1.52262	1.66878				StSub08	1.48129	1.53501	1.75208
StSub09	2.70392	2.91132	2.25623				StSub09	2.67919	1.73747	3.38993
StSub10	4.10367	3.41675	4.80153				StSub10	4.60832	3.69438	3.36264
StSub11	3.03489	3.03373	1.66967				StSub11	1.95392	1.85472	1.63509
StSub12	3.54316	1.67419	2.83037				StSub12	4.40839	2.51873	3.04389
StSub13	4.58064	3.1769	3.95346				StSub13	3.79252	4.87252	3.46224
StSub14	1.83766	2.26671	1.87421				StSub14	1.92249	1.59336	1.96203
StSub15	1.96442	3.25778	1.97875				StSub15	2.42846	2.65531	3.62326
ClSub01	1.59368	1.30073	0.790472				ClSub01	0.755809	0.926493	0.793841
ClSub02	2.1496	1.08642	1.88982				ClSub02	1.79069	1.61501	1.40308
ClSub03	1.16741	1.63379	1.45783				ClSub03	1.32677	1.96631	2.39584
ClSub04	1.73555	1.11711	1.47343				ClSub04	1.30489	1.17651	1.18458
ClSub05	2.80593	2.33568	2.87539				ClSub05	2.15828	1.43147	1.0788
ClSub06	2.30532	2.05652	1.80142				ClSub06	1.99871	1.94018	1.63311
ClSub07	1.73717	1.21928	1.3218				ClSub07	1.24469	1.24698	1.17255
ClSub08	2.05422	3.11291	1.73845				ClSub08	1.65281	2.43524	1.45441
ClSub09	1.12387	0.973237	0.912359				ClSub09	1.56373	2.09411	1.37392
ClSub10	1.16741	1.63379	2.45783				ClSub10	1.32677	1.96631	2.39584
ClSub11	1.31611	1.12272	2.09074				ClSub11	1.40748	1.55865	2.0617
ClSub12	1.14705	0.927854	0.661201				ClSub12	1.44079	1.21263	0.905533
ClSub13	0.755809	0.926493	0.790472				ClSub13	1.59368	1.30073	0.793841
ClSub14	0.880186	0.952401	0.946204				ClSub14	1.08441	1.02103	1.16615
ClSub15	1.33542	1.12861	1.13387				ClSub15	1.76386	1.61063	1.45963

## Sheet: HipFlexion
	HipFlexion_P					HipFlexion_N
	Level	#3	#6			Level	#3	#6
StSub01	5.87719	6.65768	7.00374		StSub01	22.5613	20.948	26.3037
StSub02	13.8063	20.253	17.6218		StSub02	25.8371	30.2317	34.9868
StSub03	8.14163	9.78552	9.97688		StSub03	18.7767	17.1421	17.5525
StSub04	17.9514	18.3606	27.8177		StSub04	28.3846	30.5944	36.2325
StSub05	18.3214	20.2527	26.2427		StSub05	24.42	26.3483	29.5723
StSub06	10.5672	11.6485	16.8512		StSub06	33.6944	37.1834	38.7948
StSub07	12.3125	20.1311	17.3342		StSub07	16.6656	25.2347	27.0013
StSub08	20.2659	20.545	24.0754		StSub08	26.7127	25.2955	30.0899
StSub09	11.736	15.1658	15.8073		StSub09	20.6532	22.1471	26.809
StSub10	28.854	36.9157	36.827		StSub10	31.3354	36.49	40.2933
StSub11	27.531	28.6627	31.1473		StSub11	28.2633	30.8135	40.3331
StSub12	15.054	13.1746	19.7609		StSub12	18.5031	18.8149	26.417
StSub13	29.9474	31.4984	34.3199		StSub13	36.996	37.4348	37.3062
StSub14	27.1257	30.2588	36.0279		StSub14	27.9299	31.82	36.5856
StSub15	21.2386	25.3116	26.8953		StSub15	25.0633	25.2826	37.1038
ClSub01	18.6903	23.1394	26.1362		ClSub01	19.4051	23.1186	26.39
ClSub02	18.977	21.6492	23.7992		ClSub02	18.4182	20.0152	23.2464
ClSub03	15.9549	37.3373	38.417		ClSub03	21.9352	36.1713	43.9079
ClSub04	16.0318	18.346	22.9911		ClSub04	19.4098	19.224	24.9067
ClSub05	20.4591	29.9282	34.4995		ClSub05	21.4302	29.1756	36.2928
ClSub06	33.1478	37.7741	44.2865		ClSub06	36.8388	40.3382	44.5046
ClSub07	28.6832	34.8366	36.2975		ClSub07	31.9356	35.3075	36.1198
ClSub08	36.1033	40.3737	46.2418		ClSub08	47.3616	41.1313	33.0032
ClSub09	26.9119	34.7629	39.9056		ClSub09	41.407	36.0261	25.2755
ClSub10	20.9549	37.3373	36.1713		ClSub10	21.9352	43.9079	38.417
ClSub11	23.4641	25.8787	32.4115		ClSub11	25.8525	30.105	33.3641
ClSub12	21.1776	23.8615	20.8657		ClSub12	23.1264	28.722	24.5849
ClSub13	18.6903	23.1394	26.1362		ClSub13	23.4051	26.1186	26.39
ClSub14	29.51	33.7369	39.3107		ClSub14	32.0846	40.5225	43.0451
ClSub15	21.822	36.4981	37.972		ClSub15	24.4556	37.7884	32.2107
	HipFlexion_PV					HipFlexion_NV
	Level	#3	#6			Level	#3	#6
StSub01	2.92649	2.35874	1.86638		StSub01	2.83635	2.41721	2.50822
StSub02	2.35333	2.73809	2.87413		StSub02	5.53409	4.76349	5.14933
StSub03	1.79108	1.38239	3.17111		StSub03	3.12773	2.09724	3.74127
StSub04	4.25979	4.45128	1.58664		StSub04	1.87931	2.54793	1.9184
StSub05	1.53299	2.7098	1.42886		StSub05	1.88461	2.94278	2.12762
StSub06	1.84815	1.28413	1.92909		StSub06	2.79656	2.12008	2.5719
StSub07	0.895032	2.01253	1.73643		StSub07	1.89001	2.06101	2.70872
StSub08	1.1693	1.26241	1.62559		StSub08	1.22256	1.97797	2.77993
StSub09	4.52617	2.7644	5.96573		StSub09	6.98798	2.11087	3.39964
StSub10	3.99844	3.62734	4.00402		StSub10	2.7794	3.18732	4.23726
StSub11	2.44412	2.66247	2.60766		StSub11	2.73851	2.65456	3.07083
StSub12	3.9142	2.46791	6.90282		StSub12	6.24357	2.32492	9.03245
StSub13	4.66528	4.99998	4.52787		StSub13	3.5241	2.30855	3.26022
StSub14	1.1434	1.42204	1.70979		StSub14	0.939297	2.5987	1.20876
StSub15	3.0376	3.49248	3.14007		StSub15	3.0083	4.46924	4.6301
ClSub01	1.20402	1.87308	1.65376		ClSub01	2.17054	2.84325	2.15536
ClSub02	1.89626	1.15381	2.47319		ClSub02	1.89662	2.67847	3.21933
ClSub03	1.68673	3.73677	4.23278		ClSub03	1.40954	4.69634	3.67504
ClSub04	2.01254	1.63369	1.77416		ClSub04	1.39649	1.32726	3.87559
ClSub05	1.78804	3.54562	3.23886		ClSub05	2.28673	3.41532	2.92028
ClSub06	3.05751	2.56438	1.60725		ClSub06	3.84521	2.10555	1.7985
ClSub07	2.06552	1.68796	1.43051		ClSub07	1.95631	1.62948	1.49944
ClSub08	3.39898	1.57897	2.41738		ClSub08	2.54853	1.4107	1.12631
ClSub09	3.55779	1.5065	1.6939		ClSub09	2.76977	1.39251	1.36851
ClSub10	3.67504	2.70562	1.68673		ClSub10	1.40954	2.65553	4.23278
ClSub11	1.73732	1.40362	1.23348		ClSub11	1.80721	1.67021	2.12367
ClSub12	1.09932	1.27332	1.52295		ClSub12	1.46874	2.34008	1.95054
ClSub13	1.20402	1.87308	2.15536		ClSub13	3.17054	2.84325	1.65376
ClSub14	0.902802	1.75616	1.20545		ClSub14	1.14476	1.70269	1.36937
ClSub15	2.94922	2.47055	2.11013		ClSub15	2.62536	1.97956	2.06492

## Sheet: KneeExtenrion
	KneeExtension_P					KneeExtension_N
	Level	#3	#6			Level	#3	#6
StSub01	-6.05032	-6.33632	-5.29095		StSub01	0.628624	0.53474	0.173166
StSub02	-5.08078	-3.55589	-5.77284		StSub02	8.32839	9.36882	10.8004
StSub03	5.91321	6.6001	4.04096		StSub03	10.5567	8.1869	6.82939
StSub04	-2.36497	-1.60188	-0.185531		StSub04	2.3841	3.23192	2.1435
StSub05	-4.81425	-3.45735	-3.37406		StSub05	12	11.724	10.2957
StSub06	-9.17533	-9.09127	-9.09127		StSub06	6.43553	9.07079	9.07079
StSub07	-9.09127	-9.17533	-8.52795		StSub07	9.07079	6.43553	9.72971
StSub08	-4.58678	-4.69176	-4.38276		StSub08	0.408827	3.72844	5.58401
StSub09	2.24749	0.134025	0.328484		StSub09	6.45884	3.24139	5.67204
StSub10	-2.53057	-1.06865	-1.02039		StSub10	0.159939	0.472773	0.288724
StSub11	-8.14489	-4.53155	-5.20533		StSub11	11.4533	10.0486	6.6617
StSub12	-2.42155	-3.76479	-2.23164		StSub12	4.18707	0.952867	3.43355
StSub13	-9.11858	-6.16591	-6.22802		StSub13	4.42581	1.72705	4.74129
StSub14	-3.52796	-4.11259	-4.71064		StSub14	3.24655	4.62917	4.90711
StSub15	0.525461	-4.65608	-4.09375		StSub15	3.69915	8.22959	7.87121
ClSub01	0.34957	3.32758	5.10819		ClSub01	0.302174	3.74246	5.57925
ClSub02	-2.77998	-0.420491	-0.302		ClSub02	-2.03178	-0.450595	-0.245651
ClSub03	2.00999	2.08431	3.49203		ClSub03	3.03111	3.17702	4.47705
ClSub04	-0.889489	-0.303438	-2.28064		ClSub04	-0.94082	-0.451561	-2.62673
ClSub05	3.11262	7.97488	9.81695		ClSub05	4.56751	6.62882	8.60135
ClSub06	1.05245	2.1318	2.98016		ClSub06	1.19631	2.41707	3.09558
ClSub07	2.16688	1.71566	1.78391		ClSub07	2.07685	2.06941	2.02276
ClSub08	-0.343285	3.41799	-0.487785		ClSub08	-0.526815	3.23391	0.404292
ClSub09	-1.24218	-2.39406	-2.19677		ClSub09	-1.78227	-2.23719	-3.13801
ClSub10	3.00999	3.49203	1.62892		ClSub10	3.17702	4.47705	2.12565
ClSub11	7.04878	4.59208	4.23144		ClSub11	9.80903	5.06691	4.19867
ClSub12	-1.45066	0.932631	3.51302		ClSub12	0.191719	1.65525	3.4028
ClSub13	1.96504	5.10819	3.32758		ClSub13	2.30217	5.57925	3.74246
ClSub14	-1.37574	5.51105	8.17877		ClSub14	-1.33941	6.48825	8.98712
ClSub15	-2.93529	6.58206	6.91265		ClSub15	-3.86037	6.26446	8.31827
	KneeExtension_PV					KneeExtension_NV
	Level	#3	#6			Level	#3	#6
StSub01	0.820698	0.748097	0.997606		StSub01	1.28505	1.247	1.01123
StSub02	4.82938	4.3802	4.0017		StSub02	1.55971	1.25282	2.17701
StSub03	5.91321	4.14046	3.54559		StSub03	1.55667	1.95691	3.67097
StSub04	1.47875	2.34937	1.31149		StSub04	2.13105	1.47576	3.06158
StSub05	3.15843	3.48952	3.26225		StSub05	2.90257	1.43629	1.07562
StSub06	0.971599	0.788776	1.44047		StSub06	2.9133	2.72538	2.73693
StSub07	0.510587	0.724824	0.803149		StSub07	2.37231	2.18588	2.01335
StSub08	2.21667	2.03214	0.858881		StSub08	2.34027	2.68899	1.45342
StSub09	2.84751	2.40837	1.02607		StSub09	2.32383	2.11954	3.27792
StSub10	4.18912	3.54619	3.22665		StSub10	5.10341	3.64985	3.89532
StSub11	3.07982	2.56652	1.35357		StSub11	1.90585	1.57887	1.64581
StSub12	1.00832	1.33175	1.48029		StSub12	0.957151	2.04533	1.34746
StSub13	4.12189	3.49649	3.34407		StSub13	4.33847	3.75039	4.68228
StSub14	1.5454	1.93398	1.77036		StSub14	3.42963	1.74676	1.90613
StSub15	2.48574	2.82297	2.01526		StSub15	4.05334	5.6831	6.45204
ClSub01	1.80108	1.71422	1.27044		ClSub01	3.04878	2.3421	1.56292
ClSub02	1.10227	1.22623	1.2414		ClSub02	0.797228	2.41117	1.85962
ClSub03	1.79297	1.6586	1.62892		ClSub03	2.18512	2.00812	2.12565
ClSub04	1.10544	0.878066	1.12715		ClSub04	1.19703	1.0857	1.64775
ClSub05	2.50765	2.29395	1.95439		ClSub05	2.56038	1.57371	1.3889
ClSub06	2.74797	2.50592	1.97998		ClSub06	2.70878	1.57441	1.33536
ClSub07	1.81844	1.20899	1.16953		ClSub07	2.00519	1.21696	1.12207
ClSub08	1.97513	1.96068	1.50154		ClSub08	3.32793	1.9151	1.42359
ClSub09	2.59062	1.14481	1.51189		ClSub09	1.68351	1.13154	1.29245
ClSub10	1.79297	1.6586	0.918533		ClSub10	2.18512	1.00812	1.47141
ClSub11	1.66853	1.38909	1.36275		ClSub11	1.24811	0.971755	1.87245
ClSub12	1.61823	1.62877	2.04337		ClSub12	1.66384	1.61872	2.07915
ClSub13	1.80108	1.71422	1.27044		ClSub13	3.04878	2.3421	1.56292
ClSub14	1.73952	1.77669	1.59242		ClSub14	2.19497	1.94049	1.23292
ClSub15	2.06692	2.31843	2.06009		ClSub15	3.42532	1.7057	1.58801

## Sheet: KneeFlexion
	KneeFlexion_P						KneeFlexion_N
	Level	#3	#6				Level	#3	#6
StSub01	29.9049	30.4909	31.8948			StSub01	54.0612	57.9213	58.7958
StSub02	50.0382	49.7234	43.7531			StSub02	65.6515	66.6227	65.6835
StSub03	27.0769	27.2573	22.4672			StSub03	35.4662	31.8592	31.9121
StSub04	64.015	62.9044	61.4404			StSub04	64.0616	63.4349	64.3696
StSub05	50.9438	49.9785	48.8469			StSub05	58.811	59.3044	59.9036
StSub06	53.0485	53.3755	53.4741			StSub06	70.4795	72.5534	72.747
StSub07	48.262	47.941	47.4609			StSub07	50.6154	52.7473	52.8232
StSub08	12.9123	12.6361	12.342			StSub08	31.6415	34.2551	34.5638
StSub09	28.9306	26.6885	25.4793			StSub09	46.7766	51.4038	51.0046
StSub10	49	48.1431	45.4954			StSub10	49.6285	52.4579	53.5746
StSub11	40.795	39.5138	33.925			StSub11	37.9626	39.8756	42.3181
StSub12	32.4671	30.7994	30.1081			StSub12	53.4262	53.067	53.8626
StSub13	55.6322	53.2545	47.3055			StSub13	53.0303	53.5235	63.667
StSub14	49.1282	50.5692	52.5333			StSub14	51.1231	52.5253	52.434
StSub15	48.1753	49.5538	51.329			StSub15	61.7593	63.9888	65.1636
ClSub01	57.3572	59.5843	62.2421			ClSub01	58.2198	61.4988	63.5625
ClSub02	60.5629	61.4216	63.0626			ClSub02	60.1774	62.2406	62.3755
ClSub03	52.8573	66.807	66.348			ClSub03	62.8366	62.3524	63.177
ClSub04	52.7676	55.8673	62.002			ClSub04	56.3115	59.86	63.1573
ClSub05	56.6997	58.8898	62.9771			ClSub05	61.7115	64.4406	66.726
ClSub06	59.6777	61.1271	61.5577			ClSub06	61.846	62.0051	64.1178
ClSub07	64.5553	70.8871	70.4388			ClSub07	64.1375	68.3353	69.7154
ClSub08	67.1817	67.5754	68.0299			ClSub08	64.7016	66.0311	70.3196
ClSub09	55.9363	56.4293	56.7297			ClSub09	55.0514	57.7913	58.0423
ClSub10	62.8366	62.3524	63.177			ClSub10	66.807	66.348	52.8573
ClSub11	56.2453	56.7045	54.8485			ClSub11	59.8467	55.12	52.6682
ClSub12	59.1509	59.3518	57.7494			ClSub12	60.2583	59.4909	63.1657
ClSub13	55.3572	56.5843	55.5625			ClSub13	58.2198	61.4988	60.2421
ClSub14	63.8569	68.3228	69.1931			ClSub14	62.6752	65.8012	67.2199
ClSub15	66.2126	64.3827	68.0476			ClSub15	65.5985	66.7311	72.5467
	KneeFlexion_PV						KneeFlexion_NV
	Level	#3	#6				Level	#3	#6
StSub01	2.43259	2.77141	1.97701			StSub01	2.21175	4.19821	3.03118
StSub02	3.5296	3.39618	9.73779			StSub02	3.56106	2.49238	3.88721
StSub03	4.92987	4.36248	5.74499			StSub03	5.6217	2.71238	4.16302
StSub04	2.10873	1.87038	1.99609			StSub04	3.24569	3.63041	3.81354
StSub05	2.67681	2.55545	2.71303			StSub05	3.42145	4.38766	4.51895
StSub06	2.32452	2.04768	3.2718			StSub06	3.91829	1.60322	2.48171
StSub07	2.64813	2.81502	2.99729			StSub07	2.07619	2.35575	2.71791
StSub08	1.31575	1.53009	1.89312			StSub08	3.30792	0.815501	1.31975
StSub09	3.09877	6.47797	4.89694			StSub09	4.7169	5.05915	3.0806
StSub10	5.59862	5.63733	3.64264			StSub10	5.39704	3.35026	2.84466
StSub11	3.07498	3.09417	2.6755			StSub11	4.23975	4.04002	3.10854
StSub12	4.00244	4.60495	5.25494			StSub12	3.58743	4.48561	3.43274
StSub13	6.12909	8.42138	4.75949			StSub13	6.47027	4.73873	4.99095
StSub14	2.50001	2.43923	2.0962			StSub14	3.90686	2.6443	2.09855
StSub15	2.51506	2.29897	1.75689			StSub15	4.04751	4.17135	4.9544
ClSub01	2.04878	2.67225	2.04055			ClSub01	1.72101	1.63547	1.35452
ClSub02	1.43638	1.71665	2.29095			ClSub02	1.94014	1.97676	1.5071
ClSub03	1.75494	1.63937	2.45913			ClSub03	2.11116	2.43523	2.687
ClSub04	2.69844	2.87927	2.42799			ClSub04	2.78163	2.68008	2.47092
ClSub05	1.73168	1.40742	1.527			ClSub05	2.10615	1.54392	1.41655
ClSub06	1.93336	1.91439	1.67038			ClSub06	2.12656	1.96285	2.42474
ClSub07	1.92579	1.79073	2.45663			ClSub07	2.19354	1.73248	1.57227
ClSub08	2.19266	2.55008	1.86982			ClSub08	2.08856	3.29336	2.00673
ClSub09	1.70293	1.36756	0.866782			ClSub09	1.42951	1.1262	1.56145
ClSub10	1.75494	1.63937	2.70562			ClSub10	2.11116	2.43523	2.65553
ClSub11	1.84337	1.7017	1.2748			ClSub11	1.70702	1.47839	1.53586
ClSub12	1.89663	2.26011	2.04027			ClSub12	2.5086	1.97155	2.40567
ClSub13	1.72101	1.63547	1.35452			ClSub13	3.48603	2.67225	2.04055
ClSub14	1.37474	1.59231	1.48209			ClSub14	1.52505	1.47133	1.43393
ClSub15	2.47663	1.97869	1.96726			ClSub15	1.34196	2.78441	1.38385

## Sheet: AnklePlantar
	AnklePlantar_P					AnklePlantar_N
	Level	#3	#6			Level	#3	#6
StSub01	-8.62959	-8.3261	-6.10697		StSub01	-7.40232	-7.02576	-7.34366
StSub02	-15.9697	-15.011	-11.7649		StSub02	-6.32032	-12.7225	-14.0483
StSub03	-2.48492	-1.86883	-1.37418		StSub03	1.60554	2.28881	3.46791
StSub04	-7.83441	-6.42887	-7.02827		StSub04	-16.0617	-16.3892	-18.7951
StSub05	-4.81425	-0.500349	-3.37406		StSub05	2.5278	-0.869586	-1.95545
StSub06	-11.7494	-10.7609	-9.28538		StSub06	-11.8725	-17.3166	-18.9874
StSub07	-4.15053	-3.11851	-1.77375		StSub07	-7.78102	-2.81634	1.2627
StSub08	-10.201	-11.2309	-9.71277		StSub08	-3.32792	-4.03274	-2.44588
StSub09	-7.93013	-6.35233	-3.65105		StSub09	-2.45564	-1.67742	0.736128
StSub10	-0.167554	-2.30513	-2.93497		StSub10	-2.84991	1.34991	1.65342
StSub11	-5.00518	-5.91085	-2.70556		StSub11	-4.14498	-6.54402	4.31599
StSub12	-10.8837	-14.9132	-12.2396		StSub12	-14.9318	-7.80667	-12.4783
StSub13	-1.13915	0.85959	0.101529		StSub13	6.19689	6.50241	4.74129
StSub14	-7.84442	-7.65674	-8.42558		StSub14	-4.81126	-6.09724	-6.0035
StSub15	-13.1042	-13.9413	-21.132		StSub15	-6.46309	-8.22989	-8.25055
ClSub01	-6.38444	-5.58484	-8.25548		ClSub01	-7.84931	-5.25144	-6.33918
ClSub02	-19.3049	-21.381	-24.09		ClSub02	-20.6139	-22.9323	-24.6878
ClSub03	-13.4606	-19.7365	-21.2621		ClSub03	-12.6608	-24.2041	-25.2933
ClSub04	-12.5451	-14.3842	-14.2822		ClSub04	-14.8995	-14.4386	-14.5563
ClSub05	-9.96575	-7.67512	-12.6891		ClSub05	-9.90407	-7.68046	-14.7847
ClSub06	-8.76594	-9.00568	-11.0654		ClSub06	-10.1424	-12.7638	-12.8745
ClSub07	-9.50022	-16.1321	-21.2441		ClSub07	-9.14359	-14.1128	-19.1729
ClSub08	-10.7798	-15.802	-15.9984		ClSub08	-11.1994	-17.3395	-18.1339
ClSub09	-19.468	-23.3951	-24.9262		ClSub09	-21.0782	-22.5279	-25.2941
ClSub10	-12.6608	-23.7365	-25.2933		ClSub10	-13.4606	-24.2041	-31.2621
ClSub11	-3.95298	-3.05816	-4.6578		ClSub11	-5.06623	-5.88343	-5.2118
ClSub12	-13.5502	-15.8505	-21.0312		ClSub12	-18.7729	-20.5487	-21.1347
ClSub13	-10.8493	-7.25144	-6.33918		ClSub13	-10.3844	-5.58484	-8.25548
ClSub14	-19.1075	-19.4593	-20.0197		ClSub14	-14.6208	-15.1433	-19.2337
ClSub15	-21.8788	-24.4771	-29.8267		ClSub15	-22.9435	-20.1028	-25.294
	AnklePlantar_PV					AnklePlantar_NV
	Level	#3	#6			Level	#3	#6
StSub01	5.07099	4.21413	4.30584		StSub01	3.48687	3.68211	3.73655
StSub02	6.11343	3.57298	3.87022		StSub02	3.91949	5.94155	7.03076
StSub03	1.94264	2.47172	1.01499		StSub03	1.27466	1.3645	1.63552
StSub04	1.28353	2.45585	1.58937		StSub04	3.6643	4.55072	3.22291
StSub05	3.15843	2.74594	1.07562		StSub05	3.41429	2.29808	2.08768
StSub06	1.46604	2.18553	1.88225		StSub06	3.97626	5.10456	1.87266
StSub07	1.20152	1.01644	1.24483		StSub07	1.47297	1.87083	1.65578
StSub08	2.49905	1.64007	1.64292		StSub08	1.47318	1.36577	1.20816
StSub09	2.76179	2.58171	2.57445		StSub09	2.50113	2.93546	2.8958
StSub10	2.36784	2.34606	2.38383		StSub10	2.72023	3.3341	3.75969
StSub11	2.28121	1.86015	1.64581		StSub11	2.47305	1.80725	1.35357
StSub12	2.83892	2.78412	2.7266		StSub12	2.77252	3.58396	5.1108
StSub13	1.80434	3.34427	1.60359		StSub13	1.933	3.1596	4.68228
StSub14	2.28466	2.61365	2.16209		StSub14	2.2839	1.85038	1.73049
StSub15	4.2408	4.58828	4.78297		StSub15	4.66628	5.64704	6.0756
ClSub01	1.62421	1.72493	1.79791		ClSub01	1.94268	2.48953	2.02247
ClSub02	2.49346	3.41117	4.57891		ClSub02	2.24273	2.26575	3.94155
ClSub03	3.9025	2.79561	3.67685		ClSub03	4.15215	3.65741	4.39153
ClSub04	1.68182	1.08877	2.57187		ClSub04	1.682	3.73002	2.95124
ClSub05	2.2837	1.78601	0.936699		ClSub05	1.67382	1.08413	1.18896
ClSub06	2.61827	2.80546	4.4708		ClSub06	2.55609	3.57558	3.39907
ClSub07	3.02276	2.94181	5.09996		ClSub07	3.6858	4.29864	3.18565
ClSub08	5.65524	2.79772	2.87038		ClSub08	4.2228	3.52574	3.45779
ClSub09	2.07302	2.19684	2.34444		ClSub09	2.97619	1.66057	2.42283
ClSub10	4.15215	4.39153	3.65741		ClSub10	3.9025	3.67685	2.79561
ClSub11	1.44087	1.30594	1.65365		ClSub11	0.987574	1.28706	0.841594
ClSub12	2.51842	3.13659	3.24023		ClSub12	3.40954	3.57179	3.10581
ClSub13	2.02247	1.94268	2.48953		ClSub13	1.72493	1.79791	1.62421
ClSub14	2.53267	3.78794	3.60089		ClSub14	2.44369	3.378	3.41032
ClSub15	2.64482	4.90545	3.28776		ClSub15	3.63717	2.71569	4.87642

## Sheet: AnkleDosi
	AnkleDosi_P						AnkleDosi_N
	Level	#3	#6				Level	#3	#6
StSub01	19.9353	20.6886	26.0656			StSub01	35.8053	36.27	37.0348
StSub02	4.86303	6.81914	6.78081			StSub02	14.6946	15.8063	16.0759
StSub03	6.45805	7.74043	5.41082			StSub03	7.30451	7.94145	8.47785
StSub04	8.97636	10.1103	11.2026			StSub04	6.12861	6.79666	7.65732
StSub05	-2.81414	8.91612	-1.28994			StSub05	15.105	14.6914	15.1308
StSub06	6.53297	8.2554	8.81942			StSub06	13.9909	14.7663	16.4205
StSub07	12.941	12.0708	15.4945			StSub07	10.7519	12.913	12.1063
StSub08	4.53001	4.69633	5.0509			StSub08	9.06016	9.26477	10.8438
StSub09	8.01001	8.35378	10.6835			StSub09	9.54459	11.6975	14.0078
StSub10	12.2729	13.3854	15.4449			StSub10	13.0951	13.5416	14.5387
StSub11	5.68668	5.02239	4.09349			StSub11	6.6243	4.90541	3.84953
StSub12	7.18489	10.38	9.93848			StSub12	7.67186	8.57227	9.67231
StSub13	12.5307	14.3699	15.7439			StSub13	18.5635	18.1257	18.6698
StSub14	6.5594	9.4456	10.4885			StSub14	7.72439	9.66794	11.5597
StSub15	8.36144	10.5066	12.7349			StSub15	9.62616	11.6222	16.0367
ClSub01	12.602	13.5894	12.2914			ClSub01	12.5036	13.345	12.8628
ClSub02	7.20939	8.74402	12.3318			ClSub02	8.26718	10.5091	11.9973
ClSub03	5.79856	7.48428	7.93073			ClSub03	6.43034	7.12686	9.32102
ClSub04	9.18078	7.0621	8.69553			ClSub04	10.8317	8.41638	8.11391
ClSub05	12.9245	11.9644	5.33062			ClSub05	20.4074	14.3207	5.11895
ClSub06	5.25415	6.16054	6.61965			ClSub06	6.03647	6.60663	7.96886
ClSub07	8.82385	6.558	11.554			ClSub07	10.6468	6.31653	15.4766
ClSub08	6.7135	5.92402	7.16517			ClSub08	8.6356	7.71713	9.80644
ClSub09	3.94629	5.57533	6.19869			ClSub09	4.46136	6.51482	8.21183
ClSub10	5.79856	7.93073	7.48428			ClSub10	6.12686	9.32102	6.43034
ClSub11	10.6882	13.02	14.22			ClSub11	12.0141	13.6431	14.8435
ClSub12	8.97169	9.30147	14.0104			ClSub12	8.52142	13.9914	14.8301
ClSub13	15.5036	12.5894	12.2914			ClSub13	12.602	13.345	12.8628
ClSub14	6.82644	10.221	9.56109			ClSub14	10.7887	12.8759	13.1388
ClSub15	9.29439	16.7948	13.8986			ClSub15	12.9167	18.4959	20.2501
	AnkleDosi_PV						AnkleDosi_NV
	Level	#3	#6				Level	#3	#6
StSub01	3.27897	3.43477	3.31746			StSub01	2.24428	2.70939	2.62393
StSub02	1.91437	2.39669	3.32532			StSub02	1.19381	1.34641	1.68145
StSub03	2.44779	2.2648	2.22059			StSub03	1.08588	1.09977	1.8888
StSub04	1.16383	1.42649	0.914001			StSub04	1.21584	1.31975	1.18845
StSub05	3.61705	1.95827	1.82962			StSub05	2.03194	1.17114	0.895974
StSub06	1.6728	1.53391	1.88225			StSub06	1.90383	2.08519	1.87266
StSub07	1.20813	1.22141	1.31179			StSub07	1.04375	1.06385	0.84129
StSub08	1.02688	0.548708	0.700597			StSub08	1.56172	1.00602	0.967401
StSub09	2.2105	2.28424	1.61975			StSub09	3.08308	1.50449	1.48193
StSub10	1.43726	1.47877	2.12568			StSub10	1.78091	1.22142	1.64912
StSub11	1.04475	0.858254	1.64912			StSub11	2.21045	1.51293	2.12568
StSub12	1.02183	1.2795	1.38718			StSub12	1.67284	1.95059	1.70473
StSub13	2.50854	0.871978	1.01435			StSub13	1.68889	2.0363	1.41113
StSub14	1.01369	1.06713	0.949182			StSub14	1.8512	1.43466	0.77325
StSub15	1.37139	1.43944	0.987379			StSub15	3.43544	4.21829	3.72785
ClSub01	1.27963	1.85755	1.73769			ClSub01	1.74605	1.69394	1.54606
ClSub02	1.83204	1.54695	1.77073			ClSub02	2.3769	2.15433	2.15852
ClSub03	1.78742	1.59544	1.0934			ClSub03	0.926236	1.16636	1.52834
ClSub04	1.12065	1.38879	1.17138			ClSub04	1.228	1.51342	1.50229
ClSub05	1.45583	1.4401	0.936699			ClSub05	1.68171	1.55548	1.08413
ClSub06	1.86884	1.50132	1.40373			ClSub06	1.99315	1.79765	1.43244
ClSub07	1.31252	1.99128	1.83384			ClSub07	1.67964	2.69185	1.96418
ClSub08	3.05909	2.02687	1.2413			ClSub08	2.30321	1.38738	1.03643
ClSub09	1.86972	1.61403	1.60793			ClSub09	1.70211	1.56733	1.31856
ClSub10	1.99566	1.16636	1.52834			ClSub10	1.78742	1.59544	1.34705
ClSub11	0.760996	0.768646	0.691758			ClSub11	0.841508	0.605577	0.958473
ClSub12	1.1324	1.23187	1.15106			ClSub12	1.15144	1.15427	1.17273
ClSub13	1.27963	1.69394	1.54606			ClSub13	1.74605	1.85755	1.73769
ClSub14	1.06915	1.21647	0.891416			ClSub14	0.941442	1.10769	1.23871
ClSub15	1.33959	1.15151	1.363			ClSub15	1.64579	1.11732	1.1524
